# Supplementary material for: Strength and variability of the Oligocene Southern Ocean surface temperature gradient
Source: Research Square preprint supplement (doi:10.21203/rs.3.rs-1516446/v1), 2022-04-15
Supplement: Supplementary file 2 [file ae21bb3b7dccc9cda00e7551.xlsx]

## Sheet: Sheet1
Lab extraction	ODP Site	Core - Section	Interval (cm)	Depth (mbsf)	Age (Ma)	LC run ID	GDGT peak area																															Calibrated SST					non-thermal bias = TRUE
							1302	1300	1298	1296	1292	1292'	1050-1	1050-2	1050-tot	1036-1	1036-2	1036-tot	1034-1	1034-2	1034-tot	1032-1	1032-2	1032-tot	1022	1020	1018	TEX86	GDGT2/GDGT3	GDGT2/cren	GDGT0/cren	Methzhang	fcren	Ring index	RITEX	CAP-Ring	BIT	SST-Kim et al., (2010)	SST-O´Brien et al., (2017)	BAYSIAN SST (median 50%)	BAYSIAN SST (low 5%)	BAYSIAN SST (high 95%)	outlierBIT	outlierfcren	outlierGDGT2/3	outlierGDGT2/cren	outlierGDGT0/cren	outlierMethzhang	outlierCAPRI
ETH	1168	37X 1W	43-49	339.26	20.4333	LC2004000015	82369200	32014700	67405100	1760740	25998200	1836250	NA	NA	NA	NA	NA	NA	NA	NA	NA	NA	NA	NA	51040400	2214340	6375630	0.689228	38.2823	2.59268	3.16827	0.784254	0.0659704	1.3409	2.63641	1.29551	0.66253	27.544	29.3466	28.9064	22.7576	40.8282	TRUE	FALSE	TRUE	TRUE	TRUE	TRUE	TRUE
ETH	1168	37X4W	52-58	343.85	20.7512	LC2004000018	8062060	1417030	2072140	272059	8029370	525645	NA	NA	NA	NA	NA	NA	NA	NA	NA	NA	NA	NA	5464390	178393	141181	0.669449	7.61651	0.25807	1.00407	0.305388	0.0614429	1.99219	2.56242	0.570228	0.404957	26.6791	28.1836	27.7551	21.0558	37.6805	TRUE	FALSE	TRUE	TRUE	FALSE	TRUE	TRUE
ETH	1168	38X2W	76-82	350.69	21.1514	LC2004000046	21408780	4132170	4383240	1030010	31765100	1907250	689288	784915	1474203	925243	1185890	2111133	215945	556592	772537	31618	90244.3	121862	9249110	503195	209681	0.639196	4.25553	0.137989	0.673972	0.220868	0.0566414	2.33152	2.45428	0.122757	0.287771	25.3054	26.4047	25.731	19.7734	34.983	FALSE	FALSE	FALSE	FALSE	FALSE	FALSE	FALSE
ETH	1168	38 CC	15-21	357.55	21.6335	LC21030000103	1367542	247316	301295	63153.8	1.87151e+06	147610	173846	103364	277211	93235.1	133311	226546	27278.8	67676.9	94955.7	7842.8	22570.9	30413.7	1.25334e+06	54595.2	21250.8	0.674316	4.77081	0.16099	0.730716	0.232532	0.073106	2.27986	2.58039	0.300531	0.484234	26.8943	28.4698	27.9387	21.6514	38.6416	TRUE	FALSE	FALSE	FALSE	FALSE	FALSE	FALSE
ETH	1168	39X-5W	36.0--42.0	364.39	21.9306	LC2004000012	45083900	8540470	10624100	2018050	57286700	4.03198e+06	3970380	2508400	6478780	NA	NA	NA	NA	NA	NA	NA	NA	NA	31201700	1529050	1081040	0.661289	5.26454	0.185455	0.786987	0.256755	0.0657546	2.20337	2.53265	0.329282	0.396774	26.3148	27.7038	26.865	20.6843	36.4322	FALSE	FALSE	TRUE	FALSE	FALSE	FALSE	TRUE
ETH	1168	40X-3 W,	59.5--64.5	371.22	22.1763	LC2004000020	1476590	1476590	2893800	191998	4427430	402907	564918	840955	1405873	592034	774861	1366895	235518	469749	705267	86754.8	119814	206569	8111730	215492	404807	0.702618	15.072	0.653607	0.33351	0.485736	0.0834118	2.49892	2.68797	0.189056	0.710851	28.1156	30.1339	30.0159	22.948	41.0135	TRUE	FALSE	TRUE	TRUE	FALSE	TRUE	FALSE
ETH	1168	41X-4 W	57.0--61	382.39	22.4207	LC2004000043	32391400	6007450	9037790	1440590	36798800	3285460	1441610	1891000	3332610	2040480	2544570	4585050	517166	1245130	1762296	NA	NA	NA	23949300	690678	1312170	0.696153	6.27367	0.2456	0.88023	0.291423	0.0819638	2.12161	2.66293	0.541317	0.464088	27.841	29.7538	29.5159	22.3891	39.9725	TRUE	FALSE	TRUE	TRUE	FALSE	FALSE	TRUE
UU	1168	42x 7w	11-13	396.02	22.5536	LC2103000005	42326552	8821029	9677368	2.46702e+06	63983428	3.97795e+06	2.98968e+06	3059866	6.04955e+06	3938150	5936916	9875066	677178	1.69621e+06	2.37338e+06	111615	794962	906576	52069632	1.53534e+06	1.72194e+06	0.646358	3.9227	0.151248	0.661524	0.23576	0.0585325	2.34221	2.47933	0.137123	0.515195	25.6363	26.8258	26.0224	19.3559	35.0873	TRUE	FALSE	FALSE	FALSE	FALSE	FALSE	FALSE
ETH	1168	42X-CC	10.0--18.0	396.43	22.5554	LC2004000029	19837900	12838000	12567335	922075	20971100	1567110	1351220	1678650	3029870	1024530	1571810	2596340	1066460	NA	1066460	397806	NA	397806	8728610	212960	756026	0.539766	13.6294	0.599269	0.945964	0.538772	0.0695313	1.90517	2.14165	0.236486	0.406354	20.2829	20.5583	18.7407	12.2232	25.8699	TRUE	FALSE	TRUE	TRUE	FALSE	TRUE	FALSE
UU	1168	43X4W	101-103	402.02	22.5739	LC21030000029	5.69237e+06	1.80274e+06	1.33729e+06	317358	9257000	552909	166662	143908	310570	221955	261813	483767	59668.6	115301	174969	6108.3	23647	29755.3	2.22699e+06	96687.2	44795.8	0.550472	4.21382	0.144462	0.614926	0.260595	0.0563623	2.356	2.17216	0.183842	0.24607	20.8663	21.1878	19.3767	12.8121	26.8539	FALSE	FALSE	FALSE	FALSE	FALSE	FALSE	FALSE
ETH	1168	44X-2W	60.0--64.0	408.22	22.5854	LC2004000034	5171570	1675970	1049210	289955	5784760	310049	129345	112589	241934	132602	122936	255538	88811.2	NA	88811.2	4680.25	23157.4	27837.7	1232950	39746.7	30797.2	0.495977	3.61853	0.181375	0.893999	0.330972	0.050871	2.03224	2.02479	0.0074474	0.230257	17.7696	17.9834	15.3266	8.64156	21.1897	FALSE	FALSE	FALSE	FALSE	FALSE	TRUE	FALSE
ETH	1168	44X-4 W,	49.0--55.0	411.12	22.5905	LC21030000109	10242266	2622804	2622804	651305	16314034	1.0258e+06	939965	1.09638e+06	2036341	1.53412e+06	2.80675e+06	4.34087e+06	282268	1.24435e+06	1.52662e+06	39481.4	204376	243858	25146140	802948	642312	0.62113	4.027	0.16077	0.627819	0.253775	0.0591584	2.36511	2.3926	0.0274823	0.658969	24.4537	25.3425	24.0435	17.5252	32.4217	TRUE	FALSE	FALSE	FALSE	FALSE	FALSE	FALSE
UU	1168	44X-05W	60-62	412.7	22.5938	LC19030000115	14704900	3203440	3203930	1060060	23832700	1526000	894302	578028	1472330	670726	710571	1381297	175932	893051	1068983	77299.2	139046	216345	6668480	246290	125823	0.643802	3.0224	0.134434	0.617005	0.227484	0.0601766	2.40319	2.47035	0.0671563	0.285479	25.5187	26.6756	25.783	19.2666	34.7027	FALSE	FALSE	FALSE	FALSE	FALSE	FALSE	FALSE
ETH	1168	44X-6W	38.0--44.0	414.01	22.597	LC2004000044	80826700	28749700	19010000	5297970	101659000	7312830	5298510	5960870	11259380	7865400	6042380	13907780	1261570	2202180	3463750	438262	387585	825847	70779000	2549380	1073100	0.523779	3.58817	0.186998	0.795077	0.327457	0.0671075	2.13522	2.09751	0.0377043	0.485545	19.3897	19.6182	17.3922	10.7592	24.6131	TRUE	FALSE	FALSE	FALSE	FALSE	TRUE	FALSE
ETH	1168	45X-4W	75.0--79.0	420.97	22.625	LC2004000045	78453000	20465800	18966930	7402500	141348000	10410600	2334590	3150980	5485570	4769990	2724740	7494730	1073490	1657690	2731180	NA	NA	NA	35681300	1730150	765092	0.642493	2.56223	0.134186	0.555034	0.235834	0.0685997	2.48204	2.46577	0.0162745	0.256101	25.4582	26.5986	25.8959	18.8072	35.9252	FALSE	FALSE	FALSE	FALSE	FALSE	FALSE	FALSE
ETH	1168	45X-6W	18.0--22.0	423.4	22.641	LC2004000032	50233000	13635400	13167700	4100660	75313300	4934260	1851550	3919670	5771220	3994760	2520050	6514810	948937	1249790	2198727	NA	NA	NA	29488100	1281500	562499	0.619527	3.21112	0.174839	0.666987	0.278033	0.061488	2.31288	2.38723	0.0743428	0.356777	24.3769	25.2482	24.2929	18.1453	33.2255	FALSE	FALSE	FALSE	FALSE	FALSE	FALSE	FALSE
ETH	1168	46X-1W	49.0--55.0	425.82	22.6613	LC2004000033	87000700	20031100	14924900	6310000	138573000	7745490	1563990	1833530	3397520	2628550	2271950	4900500	675361	1512350	2187711	218401	622368	840769	23289400	1090970	598899	0.591298	2.36528	0.107704	0.627833	0.219986	0.0529358	2.38208	2.29548	0.0866007	0.185633	22.9916	23.5883	22.0704	16.6461	30.6577	FALSE	FALSE	FALSE	FALSE	FALSE	FALSE	FALSE
UU	1168	46X-06W	55-58	433.35	22.759	LC19030000116	27892300	6570760	6138540	2359660	53165000	2857520	1248640	1068390	2317030	2118710	1729060	3847770	338723	830073	1168796	59525.8	155944	215470	23631800	820634	362795	0.633461	2.60145	0.115462	0.524637	0.211966	0.0510066	2.52584	2.43446	0.0913773	0.359161	25.0376	26.0675	25.4962	19.0061	34.3979	FALSE	FALSE	FALSE	FALSE	FALSE	FALSE	FALSE
UU	1168	47X 4W	85-88	440.25	22.9042	LC2009000003	1.49231e+06	392813	370164	150262	3.09316e+06	230027	107326	123014	230340	168923	130978	299900	299900	34307.2	334208	16324	71476.1	87800.1	12803.2	NA	167171	0.656412	2.46347	0.119672	0.482455	0.215568	0.069219	2.59685	2.51507	0.0817795	0.149344	26.0949	27.417	26.6828	20.4165	36.3275	FALSE	FALSE	FALSE	FALSE	FALSE	FALSE	FALSE
UU	1168	47X 5W	56-58	441.47	22.9336	LC2103000007	95912488	22652500	39652364	15423433	114168464	7530243	5.18296e+06	4594569	9.77753e+06	10913332	8489068	19402400	3.52907e+06	2.82234e+06	6.35142e+06	561787	55546.9	617334	136149056	4.27092e+06	2.12481e+06	0.734308	2.57092	0.347315	0.840096	0.389758	0.0618761	2.15014	2.81475	0.664611	0.591522	29.4261	31.9973	32.5207	25.0407	43.3977	TRUE	FALSE	FALSE	TRUE	FALSE	TRUE	TRUE
UU	1168	47X-06W	60-62	443	22.9715	LC19030000117	49465800	13358100	9774000	3647570	77690700	4546000	2622380	2704710	5327090	3300440	3449930	6750370	786091	1320610	2106701	88710.4	287442	376152	39134300	1131350	484528	0.573573	2.67959	0.125807	0.636702	0.245648	0.0552795	2.35229	2.24058	0.111704	0.397291	22.0875	22.5461	21.1042	14.0608	28.5791	FALSE	FALSE	FALSE	FALSE	FALSE	FALSE	FALSE
UU	1168	48X-3W	60-62	448.1	23.1048	LC1905000062	7.85706e+06	2.11071e+06	2104890	748191	14533273	1.16505e+06	549140	573577	1.12272e+06	847374	745285	1.59266e+06	162057	303662	465719	71832.9	145157	216990	9621092	514991	225797	0.65561	2.81331	0.144832	0.540626	0.240237	0.0742148	2.50212	2.5122	0.0100781	0.459121	26.0585	27.3698	26.4426	20.5694	36.5488	TRUE	FALSE	FALSE	FALSE	FALSE	FALSE	FALSE
UU	1168	48X 5W	78-80	451.28	23.1932	LC2009000030	9902182	2367777	2.42887e+06	979180	18597538	1.27557e+06	890394	780742	1.67114e+06	1.80345e+06	1.64677e+06	3.45022e+06	3.45022e+06	337110	3787330	255186	895064	1.15025e+06	56843.8	79570.8	3558455	0.664212	2.48052	0.130602	0.532446	0.225188	0.0641855	2.52188	2.54327	0.0213898	0.217793	26.4458	27.8756	27.0039	20.5079	35.7067	FALSE	FALSE	FALSE	FALSE	FALSE	FALSE	FALSE
UU	1168	49X-03W	60-62	457.7	23.3825	LC1905000063	12264466	2.93309e+06	2465836	854838	17880952	1.52179e+06	914670	891080	1.80575e+06	1.32497e+06	1.07643e+06	2401407	286850	428769	715619	127746	251974	379720	15408104	499970	630266	0.622781	2.88456	0.137903	0.685896	0.24375	0.0784315	2.32168	2.39814	0.0764627	0.523126	24.5325	25.4395	24.5608	18.5244	33.1808	TRUE	FALSE	FALSE	FALSE	FALSE	FALSE	FALSE
UU	1168	49X4W	100-102	459.61	23.4414	LC21030000031	7246366	2.04476e+06	2.14071e+06	779676	16689956	1.12274e+06	355674	302343	658017	524172	644126	1.1683e+06	125658	219246	344904	17137.7	41760.7	58898.4	9186622	282089	120623	0.664127	2.74564	0.128263	0.434175	0.217981	0.0630304	2.66172	2.54296	0.118762	0.397537	26.442	27.8707	27.4843	20.9117	36.6549	FALSE	FALSE	FALSE	FALSE	FALSE	FALSE	FALSE
UU	1168	50X1W	57-59	464.28	23.5895	LC21030000030	12336481	2.40021e+06	2.37199e+06	853350	20277042	1.20855e+06	47291.6	579042	626334	599246	745353	1.3446e+06	120433	315347	435780	15722.6	82720.3	98442.9	8250752	358267	170543	0.648789	2.77962	0.116979	0.608396	0.2075	0.0562493	2.42465	2.48791	0.0632623	0.335151	25.7479	26.9688	26.1507	19.6625	36.0498	FALSE	FALSE	FALSE	FALSE	FALSE	FALSE	FALSE
UU	1168	50X2W	85-87	466.06	23.6474	LC21030000032	10743905	2.60101e+06	2.4677e+06	923044	22167810	1.23027e+06	261522	215567	477089	419944	515786	935731	160624	338423	499047	14839.1	84792.5	99631.6	5155652	354381	159523	0.63985	2.67344	0.111319	0.484662	0.203872	0.05258	2.58879	2.45655	0.132241	0.228578	25.3357	26.4432	25.7929	19.1621	35.0461	FALSE	FALSE	FALSE	FALSE	FALSE	FALSE	FALSE
UU	1168	50X3W	42-45	467.12	23.6823	LC20090000031	987733	167836	164096	60906.5	1.27406e+06	103860	53563.8	75649.6	129213	16729.1	122866	139596	139596	15830.4	155426	48525.1	96851.3	145376	NA	NA	170501	0.662096	2.69423	0.128798	0.775266	0.221848	0.0753744	2.24413	2.53558	0.291445	0.426024	26.351	27.7512	27.145	20.337	36.792	FALSE	FALSE	FALSE	FALSE	FALSE	FALSE	FALSE
UU	1168	50X4W	51-53	468.72	23.7353	LC2103000011	41544176	16266261	25840324	5.62763e+06	63252668	5.3657e+06	5.82656e+06	4.93617e+06	10762737	8700187	11197215	19897402	1.78483e+06	3.80615e+06	5.59098e+06	200185	646291	846477	164632432	4.23379e+06	1.74996e+06	0.693667	4.59169	0.408525	0.656797	0.410255	0.0781963	2.27556	2.65337	0.377815	0.755352	27.7347	29.6076	29.3224	22.9565	39.3923	TRUE	FALSE	FALSE	TRUE	FALSE	TRUE	TRUE
UU	1168	50X-5W	60-62	470.3	23.7883	LC1905000064	25973594	12194957	8723294	3.73845e+06	53644608	4.5501e+06	2276494	2.19991e+06	4.47641e+06	4.1371e+06	3.48624e+06	7.62334e+06	1.70284e+06	2.47102e+06	4.17385e+06	359982	1.36082e+06	1.7208e+06	56056704	2139258	821692	0.582462	2.3334	0.162613	0.484179	0.297601	0.0781875	2.51446	2.26785	0.246603	0.559572	22.5443	23.0687	21.6284	14.9017	30.2814	TRUE	FALSE	FALSE	FALSE	FALSE	FALSE	FALSE
ETH	1168	50X-6W	88.0--94.0	472.11	23.8495	LC21030000113	243545	63309	71151.8	20247.3	300668	20514.7	9180.2	53432.3	62612.5	24519.1	50435.5	74954.6	10271	26712.6	36983.6	6749	2523.3	9272.3	306749	12454.2	4624.8	0.638694	3.51414	0.236645	0.810013	0.325091	0.0638723	2.15597	2.45253	0.29656	0.59641	25.282	26.3752	25.5286	19.1088	35.4365	TRUE	FALSE	FALSE	TRUE	FALSE	TRUE	FALSE
UU	1168	51X1W	68-71	473.98	23.9151	LC20090000073	478141	204544	179127	58510.9	995115	87862.7	27100.9	46352.7	73453.6	63444.2	72011	135455	135455	19369.3	154824	7747.9	26494.7	34242.6	14888	NA	49460.2	0.6141	3.06143	0.180006	0.480488	0.289925	0.0811307	2.53094	2.36918	0.161766	0.183604	24.1156	24.9291	23.6686	17.0858	31.5453	FALSE	FALSE	FALSE	FALSE	FALSE	FALSE	FALSE
UU	1168	51X2W	17-19	474.98	23.9516	LC21030000033	10711927	2.06727e+06	2.29602e+06	820167	16821172	1266772	455397	615147	1.07054e+06	829371	1.00364e+06	1833014	174390	254699	429089	46010.1	70189.2	116199	13401515	506704	204048	0.679504	2.79945	0.136496	0.636812	0.222739	0.0700341	2.3974	2.59971	0.202312	0.49221	27.1219	28.7748	28.4956	21.6958	39.1266	TRUE	FALSE	FALSE	FALSE	FALSE	FALSE	FALSE
UU	1168	51X2W	122-124	476.03	23.991	LC21030000034	15913941	7077832	4888869	1.78751e+06	37102480	2.80005e+06	1.16098e+06	1.51977e+06	2.68075e+06	2574995	2.56998e+06	5.14497e+06	660892	1.30461e+06	1.9655e+06	57442.4	175662	233105	37767116	1253521	466688	0.572447	2.73501	0.131767	0.428919	0.256337	0.0701723	2.61358	2.23716	0.376411	0.551335	22.0291	22.4799	20.513	13.4995	29.603	TRUE	FALSE	FALSE	FALSE	FALSE	FALSE	TRUE
UU	1168	51X3W	77-79	477.08	24.0313	LC21030000035	11436158	3180642	3.36814e+06	1.22011e+06	26084756	1.76545e+06	828583	1.23299e+07	1.31585e+07	1.92987e+06	1.93389e+06	3.86377e+06	521725	814417	1.33614e+06	51176.6	107907	159084	26973944	1.06173e+06	351506	0.666402	2.76051	0.129123	0.438423	0.21811	0.063391	2.65599	2.55125	0.104731	0.627791	26.5436	28.0044	27.7562	21.1207	37.5106	TRUE	FALSE	FALSE	FALSE	FALSE	FALSE	FALSE
UU	1168	51X4W	31-34	478.12	24.0723	LC20090000033	3.23374e+06	827627	918920	359692	7523999	635684	155775	225218	380994	396209	275102	671311	671311	58362.6	729673	41228.2	150641	191869	49857.4	NA	425896	0.698158	2.55474	0.122132	0.42979	0.205168	0.0779054	2.69513	2.67067	0.0244574	0.12777	27.9264	29.8717	29.188	23.623	41.3731	FALSE	FALSE	FALSE	FALSE	FALSE	FALSE	FALSE
ETH	1168	51X-4W	38.0--42.0	478.2	24.0754	LC21030000114	6236030	1.58025e+06	1.5709e+06	513013	9407194	616536	180421	253735	434156	369565	477351	846916	83672.7	114901	198574	8783.1	19062.8	27845.9	6202449	192730	71964.3	0.630843	3.0621	0.166989	0.6629	0.267693	0.0615077	2.32665	2.42549	0.0988378	0.443055	24.9146	25.9136	25.0218	18.9965	33.9389	TRUE	FALSE	FALSE	FALSE	FALSE	FALSE	FALSE
UU	1168	52X1W	11-13	483.02	24.276	LC21030000036	12784398	6438422	3.78065e+06	1.13657e+06	22448916	1.7372e+06	512226	703037	1.21526e+06	1.01123e+06	721740	1.73297e+06	186201	381644	567845	27033.3	134435	161468	13922901	451107	374704	0.508249	3.32638	0.168411	0.569488	0.319501	0.0718262	2.36216	2.05626	0.305896	0.429072	18.4956	18.705	16.2594	9.46522	23.0815	TRUE	FALSE	FALSE	FALSE	FALSE	TRUE	TRUE
ETH	1168	52X-1W	136.0-142.0	484.29	24.3313	LC2004000038	703147	208056	181072	59372.8	1052740	71335.2	40759.8	31536.6	72296.4	48055	36625.3	84680.3	28536	48121.4	76657.4	13593.9	NA	13593.9	1.23034	40752.3	25042.5	0.599766	3.04975	0.172001	0.667921	0.285201	0.0634612	2.30459	2.32245	0.0178536	0.129764	23.414	24.0862	22.5605	16.1269	30.9419	FALSE	FALSE	FALSE	FALSE	FALSE	FALSE	FALSE
UU	1168	52X3W	113-115	487.04	24.4538	LC21030000037	3467	15945278	10584356	3.46232e+06	76462072	6.10527e+06	1.97737e+06	2.58657e+06	4563942	3444834	3.40598e+06	6.85082e+06	670418	1.38806e+06	2.05848e+06	98586.8	405093	503679	60333220	2.0413e+06	1.19697e+06	0.558269	3.05701	0.138426	4.53427e-05	0.266455	0.0739429	3.35609	2.19486	1.16123	0.484097	21.2841	21.6462	19.8804	12.7741	27.3621	TRUE	FALSE	FALSE	FALSE	FALSE	FALSE	TRUE
ETH	1168	52X-5W	144.0--150.0	490.37	24.6061	LC2004000040	79753500	19753700	18686700	5947310	129950000	10106400	2676970	2795680	5472650	4558040	3607730	8165770	1176450	2102430	3278880	182751	496611	679362	41074700	1789090	1145960	0.637508	3.14204	0.143799	0.613725	0.240657	0.0721595	2.40424	2.44842	0.0441795	0.296286	25.2268	26.3054	25.8984	19.464	34.479	FALSE	FALSE	FALSE	FALSE	FALSE	FALSE	FALSE
UU	1168	53X1W	51-53	493.02	24.7293	LC2103000017	35772624	8.21678e+06	5932964	1937391	47379852	3.31797e+06	2.86434e+06	2.89079e+06	5.75512e+06	4.39777e+06	4406360	8.80413e+06	1.23907e+06	2.50268e+06	3.74175e+06	103411	516271	619682	72125568	1.79905e+06	1.32494e+06	0.576566	3.06235	0.125221	0.755018	0.24088	0.065446	2.22983	2.24971	0.0198743	0.64659	22.2421	22.7221	21.2777	14.6468	28.012	TRUE	FALSE	FALSE	FALSE	FALSE	FALSE	FALSE
ETH	1168	53X-3W	97.0--103.0	496.5	24.8922	LC2004000039	10126500	2708130	2500500	681932	15427900	1039700	729575	473702	1203277	558792	557119	1115911	10210.1	17260.9	27471	NA	NA	NA	448614	17439.5	10386.2	0.609231	3.66679	0.162076	0.656376	0.263464	0.0631361	2.32803	2.35315	0.0251203	0.152113	23.8791	24.6428	23.3886	17.4633	31.3046	FALSE	FALSE	FALSE	FALSE	FALSE	FALSE	FALSE
ETH	1168	54X-1W	44.0--50.0	502.57	25.1739	LC2004000042	52367100	15116800	14929900	6538100	119332000	8628570	2059580	2657020	4716600	6661850	3658100	10319950	1154340	1670240	2824580	251462	381257	632719	59476300	2562550	1166480	0.665656	2.28352	0.125112	0.438835	0.222339	0.0674315	2.65745	2.54853	0.108915	0.384394	26.5103	27.9606	27.1634	20.955	37.3895	FALSE	FALSE	FALSE	FALSE	FALSE	FALSE	FALSE
UU	1168	54X3W	41-43	505.52	25.3071	LC21030000038	11393625	3.30896e+06	3.58542e+06	1.51126e+06	28128646	1.68252e+06	613607	877548	1491155	1.88739e+06	1043464	2.93085e+06	417276	522240	939516	59086.7	67846.7	126933	22239996	860199	348516	0.671996	2.37248	0.127465	0.405054	0.219946	0.0564393	2.70625	2.5718	0.134448	0.486616	26.7919	28.3333	27.974	21.3006	37.9428	TRUE	FALSE	FALSE	FALSE	FALSE	FALSE	FALSE
ETH	1168	54X-5 W,	57.0--63.0	508.7	25.4462	LC2004000030	40018300	12539700	12480900	5459770	95327200	7253650	1589780	700717	2290497	3739430	2167590	5907020	617376	838865	1456241	124461	188204	312665	32842900	1408100	610277	0.667682	2.28598	0.130927	0.419799	0.22907	0.0707115	2.68203	2.55594	0.126091	0.300954	26.6006	28.0797	27.8172	21.2407	37.1338	FALSE	FALSE	FALSE	FALSE	FALSE	FALSE	FALSE
UU	1168	54X-06W	60-62	510.2	25.5102	LC19030000118	28277700	7284380	7327980	2683420	60872000	3644980	1101560	1028400	2129960	1291870	1001750	2293620	385740	563346	949086	63789.1	131878	195667	14196700	732337	333077	0.652143	2.73084	0.120383	0.464544	0.211407	0.0564964	2.61656	2.49982	0.116746	0.23424	25.9011	27.166	26.6556	20.0871	34.974	FALSE	FALSE	FALSE	FALSE	FALSE	FALSE	FALSE
UU	1168	55X2W	58-60	513.79	25.6669	LC21030000039	8.02513e+06	2.20812e+06	2313718	867026	18231508	1427785	284650	439631	724281	740123	391851	1.13197e+06	175890	304895	480785	25072.7	49905.6	74978.3	8.03972e+06	413200	193245	0.676069	2.66857	0.126908	0.440179	0.21514	0.0726265	2.66299	2.5869	0.0760911	0.351826	26.9714	28.5729	27.9936	21.3349	38.1008	FALSE	FALSE	FALSE	FALSE	FALSE	FALSE	FALSE
ETH	1168	55X-5W	33.0--39.0	518.06	25.8578	LC2004000036	173333	43454.2	40189.7	13295.3	228192	19976	5767.97	8913.2	14681.2	16576.2	6172.39	22748.6	NA	NA	NA	1273.02	NA	1273.02	70449.8	3285.26	1756.41	0.628327	3.02285	0.176122	0.759593	0.280896	0.0804939	2.23052	2.41691	0.186387	0.321002	24.7959	25.7656	24.9414	18.3522	33.764	FALSE	FALSE	FALSE	FALSE	FALSE	FALSE	FALSE
UU	1168	55X-6W	60-62	519.8	25.9361	LC1905000065	20415174	5.49332e+06	4.80415e+06	1.97701e+06	40587368	2.86382e+06	686975	1.04962e+06	1.73659e+06	1.91343e+06	1.03797e+06	2.9514e+06	270901	530563	801464	249316	59277.4	308593	20085486	873309	335946	0.637124	2.43001	0.118366	0.502993	0.220266	0.0659089	2.55891	2.44709	0.111814	0.379026	25.2089	26.2829	25.3971	19.0396	35.5579	FALSE	FALSE	FALSE	FALSE	FALSE	FALSE	FALSE
UU	1168	55X7W	62-64	520.83	25.9824	LC21030000040	15790983	4.17105e+06	3397525	1.63696e+06	33131414	1507440	382244	464463	846707	1.16263e+06	515022	1.67766e+06	234716	329266	563982	60781.8	105010	165791	10582467	570331	259927	0.610654	2.07551	0.102547	0.476617	0.209959	0.0435188	2.58961	2.35782	0.231791	0.283463	23.9484	24.7265	23.8875	17.6112	31.9033	FALSE	FALSE	FALSE	FALSE	FALSE	FALSE	FALSE
UU	1168	56X2W	16-19	523.07	26.0825	LC20090000034	2890109	809356	708682	320820	6055168	420338	93021.8	135082	228104	234142	125459	359601	359601	49481.8	409082	22496	85815.2	108311	255663	NA	283161	0.64175	2.20897	0.117038	0.477296	0.221166	0.0649119	2.59639	2.46317	0.133219	0.122253	25.4238	26.5549	25.7047	19.0747	34.6883	FALSE	FALSE	FALSE	FALSE	FALSE	FALSE	FALSE
UU	1168	56X3W	92-94	525.33	26.1824	LC21030000041	13245623	3.82347e+06	3728126	1.70481e+06	30885138	2.19886e+06	374848	638669	1.01352e+06	1.41109e+06	493148	1904242	167011	307427	474438	45531.6	78060.6	123592	13943823	614465	258479	0.666226	2.18682	0.120709	0.428867	0.218619	0.066463	2.67568	2.55061	0.125063	0.353146	26.5357	27.9941	27.6825	20.7558	37.0675	FALSE	FALSE	FALSE	FALSE	FALSE	FALSE	FALSE
ETH	1168	56X-5W	37-43	527.8	26.2881	LC2004000031	2602950	728505	676629	271155	4.19098e+06	290870	105951	94830.2	200781	158921	78071.8	236993	34208.7	43684.5	77893.2	17620.9		17620.9	1231840	61584	89691.1	0.629666	2.49536	0.161449	0.621083	0.272207	0.0648995	2.37672	2.42147	0.0447521	0.284888	24.8592	25.8444	24.7956	18.5018	33.4144	FALSE	FALSE	FALSE	FALSE	FALSE	FALSE	FALSE
UU	1168	56X-6W	60-62	529.2	26.3486	LC1905000066	60625284	14091661	10895616	5269377	108478512	6937468	1.37683e+06	1.65345e+06	3.03028e+06	2.72283e+06	1.1321e+06	3.85493e+06	673247	1422095	2.09534e+06	157243	176160	333403	16351467	1.79178e+06	809375	0.621132	2.06772	0.10044	0.558869	0.207703	0.0601084	2.48842	2.3926	0.0958146	0.176416	24.4538	25.3426	24.573	18.4455	32.8103	FALSE	FALSE	FALSE	FALSE	FALSE	FALSE	FALSE
UU	1168	57X2W	72-74	533.33	26.5194	LC21030000042	22267168	5716290	4223681	2.04829e+06	38930096	2032789	624481	842085	1.46657e+06	1589194	743874	2.33307e+06	300455	546740	847195	75988.7	184934	260923	11920783	836522	354406	0.592306	2.06206	0.108494	0.571978	0.226402	0.0496251	2.44834	2.29867	0.149671	0.287654	23.0422	23.6476	22.3603	15.8592	30.4803	FALSE	FALSE	FALSE	FALSE	FALSE	FALSE	FALSE
UU	1168	57X-4W	57-59	536	26.6307	LC1905000067	33992460	10106199	9319548	4215584	78505936	5.43163e+06	914475	1.08378e+06	1.99826e+06	2.76954e+06	1.25318e+06	4.02272e+06	653593	1.03582e+06	1.68941e+06	264525	138542	403067	23892814	1.48433e+06	698837	0.652385	2.21074	0.118711	0.432992	0.219758	0.0647104	2.66397	2.50068	0.163297	0.275907	25.9121	27.1802	26.7668	20.0007	35.7043	FALSE	FALSE	FALSE	FALSE	FALSE	FALSE	FALSE
UU	1168	58X1W	65-67	541.36	26.8562	LC21030000043	11148796	2.97943e+06	2.93394e+06	1.16939e+06	23169906	1.42964e+06	289823	422746	712569	948489	377599	1326088	146853	352924	499777	32099.7	86230	118330	8666449	473724	226658	0.649989	2.50895	0.126627	0.481176	0.223556	0.0581164	2.58582	2.49216	0.0936627	0.316018	25.8028	27.0393	26.4668	20.1394	35.3975	FALSE	FALSE	FALSE	FALSE	FALSE	FALSE	FALSE
UU	1168	58X-3W	60-62	544.3	26.9804	LC1905000068	39988452	9516374	7018932	3.53259e+06	70705568	4112244	761744	881624	1.64337e+06	2.51627e+06	1149019	3.66529e+06	589707	906593	1.4963e+06	206260	173041	379302	18026724	1.7957e+06	694788	0.606438	1.98691	0.0992699	0.565563	0.211495	0.0549634	2.47211	2.34403	0.128076	0.248141	23.7426	24.4786	23.1533	16.6178	31.6261	FALSE	FALSE	FALSE	FALSE	FALSE	FALSE	FALSE
UU	1168	58X5W	87-89	547.58	27.1189	LC21030000044	18261724	4246069	2.8685e+06	1.50014e+06	34103772	1.31245e+06	366576	473358	839934	1.12e+06	486487	1.60649e+06	241686	337232	578918	61807.2	113903	175710	7687778	662837	279094	0.572277	1.91215	0.0841108	0.535475	0.195651	0.0370579	2.50669	2.23665	0.27004	0.229084	22.0203	22.4699	20.8492	14.1683	27.8396	FALSE	FALSE	FALSE	FALSE	FALSE	FALSE	FALSE
UU	1168	59X-3W	60-62	554	27.3871	LC19030000119	40624900	12311300	12273100	5300210	84130200	3877250	986819	962810	1949629	3775380	1155090	4930470	612644	788653	1401297	228025	233657	461682	23529700	1516240	771382	0.635349	2.31559	0.145882	0.482881	0.253491	0.0440559	2.55359	2.44096	0.112634	0.265495	25.126	26.1785	25.4142	18.7941	34.0646	FALSE	FALSE	FALSE	FALSE	FALSE	FALSE	FALSE
UU	1168	60X1W	25-27	560.26	27.6421	LC21030000045	13038053	3.31251e+06	2.38711e+06	1.31618e+06	24835464	978297	280516	289533	570049	889771	353936	1.24371e+06	175169	279138	454308	39945.7	98450.1	138396	6.07093e+06	552540	251636	0.585631	1.81367	0.0961169	0.524977	0.213704	0.0378983	2.51355	2.2777	0.235843	0.240973	22.7055	23.2551	21.6457	15.5853	29.249	FALSE	FALSE	FALSE	FALSE	FALSE	FALSE	FALSE
UU	1168	60X5W	60-62	566.6	27.8897	LC1905000069	52530716	12213906	8.08233e+06	4.15577e+06	93799984	3894454	819040	923201	1.74224e+06	2109898	982242	3.09214e+06	540196	775697	1.31589e+06	120854	125254	246108	12712678	1.66449e+06	735236	0.569121	1.94485	0.0861656	0.560029	0.200186	0.0398636	2.47098	2.22712	0.24386	0.157589	21.856	22.2843	20.7014	14.1383	29.1587	FALSE	FALSE	FALSE	FALSE	FALSE	FALSE	FALSE
UU	1168	61X-3W	60-62	573.2	28.1389	LC1905000070	3854380	9987870	8299734	3.89436e+06	72832896	4015545	689928	834407	1.52434e+06	2444012	965289	3.4093e+06	404538	819203	1.22374e+06	157688	125547	283235	16958526	1.23725e+06	517882	0.618747	2.13122	0.113956	0.0529209	0.223991	0.0522528	3.35972	2.38462	0.975101	0.231113	24.3395	25.2023	23.9792	17.8068	32.7737	FALSE	FALSE	FALSE	FALSE	FALSE	FALSE	TRUE
UU	1168	61X5W	91-94	576.51	28.2619	LC20090000035	2232781	310071	332261	147227	2.75788e+06	179834	30599.7	38680.6	69280.3	102788	34014.2	136802	17495.7	18762	36257.7	7718.9	7991.5	15710.4	671962	59423.5	21886.7	0.680139	2.25679	0.120477	0.809602	0.211833	0.0612156	2.20923	2.60209	0.39286	0.241492	27.1497	28.8122	28.5521	21.3588	37.8247	FALSE	FALSE	FALSE	FALSE	FALSE	FALSE	TRUE
UU	1168	62X2W	114-117	581.84	28.4559	LC20090000036	354843	775923	745991	347801	6.63604e+06	471689	55376.4	78579.6	133956	245275	92927.6	338203	31544.8	52239	83783.8	12591.1	NA	12591.1	1.95231e+06	136069	53551.7	0.668608	2.14488	0.112415	0.0534721	0.208268	0.0663628	3.40133	2.55933	0.842001	0.267586	26.6417	28.1341	27.7108	21.0287	37.0667	FALSE	FALSE	FALSE	FALSE	FALSE	FALSE	TRUE
UU	1168	62X-4W	60-62	584.3	28.5434	LC1905000071	12358567	3.12744e+06	2.45136e+06	1.07777e+06	22785474	1.69729e+06	269346	433142	702488	883740	446702	1.33044e+06	175414	401130	576545	36406.8	72285.3	108692	7.7556e+06	469504	178073	0.625629	2.27447	0.107584	0.542388	0.213767	0.0693259	2.51034	2.40775	0.102587	0.300501	24.6681	25.607	24.8755	18.2849	33.5434	FALSE	FALSE	FALSE	FALSE	FALSE	FALSE	FALSE
UU	1168	63X1W	138-141	590.13	28.7441	LC20090000037	953905	270889	313248	129208	2.56103e+06	184924	25565.7	29137	54702.7	78612.9	31459.8	110073	18378.5	19421.5	37800	9113.7	NA	9113.7	562560	45489	19539.3	0.698432	2.42437	0.122313	0.372469	0.206211	0.0673442	2.78003	2.67173	0.108298	0.221184	27.9381	29.8878	29.7559	23.2513	40.2583	FALSE	FALSE	FALSE	FALSE	FALSE	FALSE	FALSE
UU	1168	63X3W	18-20	591.99	28.806	LC21030000046	20441192	4.6204e+06	3.39344e+06	1.42996e+06	38881972	1761348	260156	338242	598398	590342	323536	913878	191951	376708	568658	37044.2	84618.4	121663	4559539	382527	180212	0.587654	2.37311	0.0872755	0.525724	0.188547	0.0433367	2.52764	2.28403	0.243618	0.135068	22.8079	23.3741	22.1608	15.8703	29.2301	FALSE	FALSE	FALSE	FALSE	FALSE	FALSE	FALSE
UU	1168	63X5W	20-22	595.01	28.9038	LC21030000048	4903356	1.16747e+06	981500	455950	9877773	498552	95910.6	157697	253607	330449	178636	509085	50077.7	87072.9	137151	13233.9	23300.5	36534.4	2.85008e+06	183919	67741.2	0.623818	2.15265	0.0993645	0.496403	0.200668	0.048047	2.57225	2.40164	0.170612	0.2678	24.582	25.5005	24.5795	18.1999	32.6626	FALSE	FALSE	FALSE	FALSE	FALSE	FALSE	FALSE
ETH	1168	63X-6W	18.0--24.0	596.51	28.9511	LC2004000049	11951800	3129590	2946460	1215780	24468500	1472570	265235	403883	669118	915962	468962	1384924	161972	206367	368339	38682.9	47804.5	86487.4	7168460	420402	180302	0.64292	2.42351	0.120418	0.488457	0.219416	0.056766	2.57685	2.46726	0.109587	0.273738	25.4779	26.6237	25.4962	18.7863	35.2077	FALSE	FALSE	FALSE	FALSE	FALSE	FALSE	FALSE
UU	1168	63X6W	64-66	596.95	28.9648	LC21030000049	4103651	1.00847e+06	860130	408846	8496974	427902	97163.2	125624	222787	344207	147073	491280	45174.8	65115.8	110291	13074.5	18681.9	31756.4	2.89832e+06	184493	59387.9	0.627231	2.1038	0.101228	0.482954	0.203301	0.0479448	2.5908	2.41318	0.17762	0.298314	24.7441	25.7012	24.7864	17.8632	33.8259	FALSE	FALSE	FALSE	FALSE	FALSE	FALSE	FALSE
UU	1168	64X1W	11-13	598.52	29.0131	LC21030000050	5251510	1.3585e+06	1.08645e+06	536458	10883900	646929	128858	226427	355286	462447	244700	707146	74822.3	90170.8	164993	16870.4	19091.3	35961.7	5.07747e+06	185753	72996	0.625586	2.02522	0.0998216	0.482503	0.205441	0.0561043	2.59384	2.40761	0.186239	0.360666	24.666	25.6044	24.7272	18.3354	34.0157	FALSE	FALSE	FALSE	FALSE	FALSE	FALSE	FALSE
UU	1168	64X1W	60-62	599	29.0276	LC20090000038	8183739	2.18525e+06	1.73041e+06	684601	16513116	925118	169289	221367	390656	550640	248965	799605	76896.5	125386	202283	27317.3	33352.2	60669.5	4.91261e+06	253183	101662	0.604507	2.52762	0.10479	0.49559	0.208737	0.0530511	2.56278	2.33775	0.225023	0.269848	23.6479	24.365	22.9956	16.2943	30.6135	FALSE	FALSE	FALSE	FALSE	FALSE	FALSE	FALSE
UU	1168	65X1W	28-20	608.29	29.2768	LC21030000051	6544567	1.36286e+06	1.07751e+06	449846	11421903	497833	89886.2	132969	222855	269267	131191	400458	75127.5	143874	219002	11852.9	23363.4	35216.3	1.98088e+06	173153	69362	0.597744	2.39529	0.0943372	0.572984	0.195154	0.0417655	2.46067	2.31597	0.1447	0.185668	23.3137	23.9674	23.1285	16.1285	31.7994	FALSE	FALSE	FALSE	FALSE	FALSE	FALSE	FALSE
UU	1168	65X-05W	60-62	614.6	29.4105	LC19030000136	13290100	3689630	3505540	1543420	28347200	1612160	241037	340095	581132	1035770	482924	1518694	129077	192574	321651	33092.3	46617.4	79709.7	8080120	394816	143895	0.64354	2.27128	0.123664	0.468833	0.225815	0.0538116	2.59999	2.46943	0.130559	0.264228	25.5066	26.6601	25.7648	19.4874	35.0353	FALSE	FALSE	FALSE	FALSE	FALSE	FALSE	FALSE
UU	1168	66X-02W	60-62	619.7	29.5014	LC1905000072	11276279	2.64785e+06	2.44858e+06	1.03823e+06	21084946	1.48312e+06	179414	317227	496641	653528	285198	938726	115652	178552	294204	23526	33323	56849	5.77852e+06	264697	118305	0.652412	2.35841	0.116129	0.534802	0.213731	0.0657175	2.52462	2.50077	0.0238533	0.254918	25.9133	27.1818	26.4016	20.2305	35.7095	FALSE	FALSE	FALSE	FALSE	FALSE	FALSE	FALSE
UU	1168	66X4W	58-60	622.69	29.5486	LC21030000052	9637144	2522988	2.06524e+06	1023935	20776444	1.07917e+06	160293	234640	394934	559762	287308	847070	121301	189257	310558	29394.7	42220	71614.7	4.66845e+06	283076	114588	0.622946	2.01696	0.0994028	0.46385	0.204318	0.0493771	2.61819	2.3987	0.219492	0.221474	24.5404	25.4493	24.6834	18.284	33.1882	FALSE	FALSE	FALSE	FALSE	FALSE	FALSE	FALSE
UU	1168	67X-02W	58-60	629.28	29.6396	LC1905000073	24039864	5.66564e+06	4.36276e+06	2043287	43407332	3217282	337957	439486	777443	1.33612e+06	661613	1.99773e+06	167123	286858	453980	47773.7	61337.3	109111	10997680	616044	219524	0.629429	2.13517	0.100507	0.55382	0.205664	0.0690039	2.50216	2.42066	0.0815028	0.240868	24.848	25.8304	24.9192	18.4623	33.4356	FALSE	FALSE	FALSE	FALSE	FALSE	FALSE	FALSE
UU	1168	68X-06W	60-62	644.9	29.8114	LC1905000074	22316634	5153409	4.17588e+06	1762798	42502104	3.35404e+06	206011	345468	551480	541745	298908	840653	110879	228424	339302	29214.8	67132.7	96347.5	4.77406e+06	400160	145703	0.643267	2.36889	0.0982511	0.525071	0.194775	0.0731427	2.55117	2.46848	0.0826942	0.126698	25.494	26.6441	25.5643	19.2292	34.4398	FALSE	FALSE	FALSE	FALSE	FALSE	FALSE	FALSE
UU	1168	69X-04W	60-62	651.5	29.8788	LC1905000075	11762203	3.04739e+06	2.62907e+06	1.15483e+06	23832062	1.63106e+06	184813	243299	428112	626700	275993	902694	73807.1	198816	272623	23368	28913.4	52281.4	5547178	301536	97760.2	0.639888	2.27659	0.110317	0.493545	0.211532	0.0640558	2.57901	2.45668	0.122327	0.223965	25.3375	26.4454	25.3739	19.1393	34.8934	FALSE	FALSE	FALSE	FALSE	FALSE	FALSE	FALSE
UU	1168	70X-02W	60-62	658.2	29.952	LC19030000120	20905200	5135240	4438200	1682660	41100900	2286970	206718	328268	534986	504916	275125	780041	116500	177367	293867	NA	NA	NA	5720940	207066	86623.3	0.620822	2.63761	0.107983	0.508631	0.20599	0.0527099	2.54948	2.39156	0.15792	0.146166	24.4389	25.3243	24.109	18.0862	34.0941	FALSE	FALSE	FALSE	FALSE	FALSE	FALSE	FALSE
UU	1168	71X-03W	60-62	669.4	30.1009	LC1905000076	3.66386e+06	949338	820775	370049	7422701	621929	85154.8	186904	272059	387234	267982	655216	55344.4	85566.2	140911	10915.3	18138.7	29054	6.23458e+06	150397	88751.4	0.656297	2.21802	0.110576	0.493602	0.210133	0.0773098	2.59083	2.51466	0.076172	0.491058	26.0897	27.4103	26.3981	20.7038	36.3579	TRUE	FALSE	FALSE	FALSE	FALSE	FALSE	FALSE
UU	1168	72X4W	60-62	680.36	30.3006	LC20090039	36628848	9654952	8.26847e+06	3996032	76040272	3.80313e+06	636042	770380	1.40642e+06	2.07692e+06	968850	3.04577e+06	352869	537210	890080	107834	125316	233150	18390258	931387	373076	0.624651	2.06917	0.108738	0.481703	0.215397	0.0476323	2.58363	2.40444	0.17919	0.231005	24.6216	25.5495	24.4278	18.1614	33.1616	FALSE	FALSE	FALSE	FALSE	FALSE	FALSE	FALSE
UU	1168	73X2W	33-35	686.84	30.454	LC21030000053	3.93236e+06	1.05405e+06	951829	455016	8853390	453273	75981.3	91707	167688	249595	129105	378700	43137.3	57319.9	100457	11539	13812.8	25351.8	2.51631e+06	83040.1	38593.4	0.638302	2.09186	0.10751	0.444164	0.209125	0.0487041	2.64647	2.45117	0.1953	0.257022	25.2638	26.3522	25.5778	19.1531	34.9285	FALSE	FALSE	FALSE	FALSE	FALSE	FALSE	FALSE
UU	1168	74X1W	60-62	695.3	30.7039	LC20090040	3.06138e+06	825456	788198	353160	7225066	459563	81240.1	90860.8	172101	164740	89536.3	254276	31428	45140.3	76568.3	NA	NA	NA	2.18978e+06	79904.2	40428.7	0.659799	2.23184	0.109092	0.423716	0.203784	0.0598029	2.69019	2.52727	0.16292	0.265836	26.2477	27.6162	26.9746	20.6756	38.9668	FALSE	FALSE	FALSE	FALSE	FALSE	FALSE	FALSE
UU	1168	75X-02W	60-62	706.4	31.1351	LC19030000121	10599400	2790100	2620730	1155490	23178300	1310690	178565	208418	386983	792575	230827	1023402	59752.3	80954.3	140707	NA	NA	NA	5210180	170027	57429.1	0.645792	2.26807	0.113068	0.457298	0.21144	0.0535216	2.62765	2.47734	0.150313	0.222175	25.6103	26.7926	25.7847	19.6841	35.6389	FALSE	FALSE	FALSE	FALSE	FALSE	FALSE	FALSE
ETH	1168	75X-4W	130.0--136.0	710.13	31.3103	LC2004000028	19788300	5550260	4764220	2970550	42519900	3114010	458970	487409	946379	1847010	711143	2558153	187348	185865	373213	NA	NA	NA	13781600	573995	222987	0.66155	1.60382	0.112047	0.465389	0.22548	0.0682389	2.62398	2.5336	0.0903789	0.289037	26.3265	27.7191	27.4231	20.5685	35.6231	FALSE	FALSE	FALSE	FALSE	FALSE	FALSE	FALSE
UU	1168	76X1W	12-14	714.03	31.5116	LC21030000054	4457707	1.11002e+06	971804	563654	9365247	432611	92156.5	57433	149590	409260	96678.8	505939	38135.8	38188.5	76324.3	22179.4	NA	22179.4	2.73496e+06	111588	38850.9	0.639381	1.72411	0.103767	0.475984	0.212602	0.0441536	2.5996	2.45492	0.144685	0.265801	25.314	26.4156	25.7235	19.2673	35.2406	FALSE	FALSE	FALSE	FALSE	FALSE	FALSE	FALSE
ETH	1168	76X-3W	130.0--136.0	718.23	31.7503	LC2004000047	8085740	2084960	1695220	1470540	12087400	629773	223005	227086	450091	921845	223486	1145331	76032.2	57973.5	134006	NA	NA	NA	6598460	2.36015	119770	0.645445	1.15279	0.140247	0.66894	0.292228	0.0495215	2.33195	2.47612	0.144168	0.404012	25.5944	26.7721	25.809	19.4819	35.0633	TRUE	FALSE	FALSE	FALSE	FALSE	FALSE	FALSE
UU	1168	76X4W	75-78	719.16	31.8063	LC20090041	848747	242906	211047	171240	1.77706e+06	105313	32562.4	34313.7	66876.1	150946	34256.8	185203	13493	8591	22084	5101	NA	5101	905744	34245.8	19591.5	0.667482	1.23246	0.118762	0.477612	0.249322	0.055947	2.59458	2.55521	0.039371	0.394503	26.5917	28.068	27.2237	21.144	38.1831	FALSE	FALSE	FALSE	FALSE	FALSE	FALSE	FALSE
UU	1168	77X1W	18-20	723.79	32.1035	LC21030000055	1.50816e+06	369286	345934	185290	3.02885e+06	156487	34647.4	49022.1	83669.5	146789	55951.7	202741	26468.5	NA	26468.5	NA	NA	NA	1.19642e+06	51995.8	18313	0.650627	1.86699	0.114213	0.49793	0.220397	0.0491273	2.56674	2.49443	0.0723188	0.328664	25.8319	27.0769	26.3189	19.6217	36.3869	FALSE	FALSE	FALSE	FALSE	FALSE	FALSE	FALSE
ETH	1168	77X-2W	142.0--148.0	726.55	32.2956	LC2004000027	17152500	4317620	3260010	2015640	34243400	1785000	342304	423414	765718	1448780	494593	1943373	123579	129736	253315	33213.8	26867.2	60081	14508800	351748	149939	0.620538	1.61736	0.0952011	0.500899	0.210279	0.0495442	2.56472	2.39061	0.17411	0.334579	24.4254	25.3076	24.5103	17.771	33.0011	FALSE	FALSE	FALSE	FALSE	FALSE	FALSE	FALSE
UU	1168	77X3X	69-72	727.295	32.3494	LC19060046	4030000	989000	696000	472000	7590000	345000	65800	99100	164900	332000	108000	440000	24700	35200	59900	7790	6349	14139	3370000	81300	37500	0.604716	1.47458	0.0916996	0.530962	0.213734	0.0434783	2.51643	2.33843	0.177996	0.343704	23.6581	24.3773	22.9604	16.4383	31.5445	FALSE	FALSE	FALSE	FALSE	FALSE	FALSE	FALSE
UU	1168	77X4W	39-42	728.48	32.4368	LC20090042	38009352	10058112	9048453	5.73499e+06	89604160	4.25869e+06	647279	863325	1.5106e+06	3389782	1.37422e+06	4.764e+06	281475	297094	578569	82010.3	53401.4	135412	35612444	1.15609e+06	374435	0.654363	1.57776	0.100983	0.424192	0.209272	0.0453714	2.68522	2.50774	0.177487	0.318554	26.002	27.2966	26.5331	20.3708	35.6259	FALSE	FALSE	FALSE	FALSE	FALSE	FALSE	FALSE
UU	1168	77X5W	11-13	729.72	32.5305	LC21030000056	852762	209505	207461	108440	1.79221e+06	98044.5	16512.2	23017	39529.2	66120.1	24218.4	90338.5	20305.6	NA	20305.6	NA	NA	NA	609569	28205.2	14612.4	0.663958	1.91314	0.115757	0.475815	0.2175	0.0518683	2.60394	2.54234	0.0615949	0.292077	26.4344	27.8607	27.5364	20.5775	36.2574	FALSE	FALSE	FALSE	FALSE	FALSE	FALSE	FALSE
UU	1168	77X5W	121-124	730.83	32.6165	LC20090043	29296878	8485687	8452454	5486321	65250200	3.88756e+06	530297	503164	1.03346e+06	2.73242e+06	827302	3.55972e+06	188907	146031	334938	NA	NA	NA	22917668	801011	505000	0.677498	1.54064	0.129539	0.448993	0.24491	0.0562292	2.63448	2.59222	0.0422603	0.296578	27.0341	28.6569	28.271	21.7191	38.7549	FALSE	FALSE	FALSE	FALSE	FALSE	FALSE	FALSE
UU	1168	77X6W	130-133	732.4	32.7393	LC20090044	52005368	14112827	14927824	9945323	109808080	6262558	992470	1.04861e+06	2.04108e+06	4.29964e+06	1.30659e+06	5606229	353913	369497	723410	117694	88701.9	206395	43581460	1232422	571257	0.688104	1.50099	0.135945	0.473602	0.251431	0.0539547	2.59868	2.63214	0.0334619	0.318118	27.4955	29.2805	29.171	22.6272	39.6823	FALSE	FALSE	FALSE	FALSE	FALSE	FALSE	FALSE
UU	1168	77X7W	13-15	732.74	32.7657	LC21030000057	1.24289e+06	331130	315318	210364	2.36749e+06	145138	29715.3	46601.3	76316.6	130278	36219.1	166497	27757.9	NA	27757.9	NA	NA	NA	1.17125e+06	37449.5	20732.3	0.669514	1.49891	0.133186	0.524983	0.254289	0.0577635	2.5244	2.56266	0.0382622	0.373938	26.682	28.1874	27.5775	21.394	37.7672	FALSE	FALSE	FALSE	FALSE	FALSE	FALSE	FALSE
UU	1168	77X7W	40-42	733.01	32.7865	LC21030000058	1.26234e+06	320919	313412	207283	2.54325e+06	151101	35224.2	40462	75686.2	143236	52487	195723	16665.7	16827	33492.7	NA	NA	NA	1.38023e+06	42567.6	19067.4	0.676726	1.512	0.123233	0.49635	0.238015	0.0560806	2.5732	2.58934	0.0161423	0.393727	27.0002	28.6115	28.3559	21.6976	37.9743	FALSE	FALSE	FALSE	FALSE	FALSE	FALSE	FALSE
UU	1168	78X1W	06-08	733.27	32.8064	LC21030000059	600777	266426	309268	95681	966923	51155.7	21137.7	26090.9	47228.6	73970.9	19734.7	93705.6	17326.6	NA	17326.6	NA	NA	NA	510560	27584.1	12696.8	0.631259	3.23228	0.319847	0.621329	0.397392	0.0502473	2.28986	2.42691	0.137047	0.40255	24.9342	25.9381	25.0137	18.7249	33.8304	TRUE	FALSE	FALSE	TRUE	FALSE	TRUE	FALSE
UU	1168	78X1W	32-34	733.53	32.8262	LC21030000060	2371190	562805	474797	334748	3.99139e+06	191018	48946	61436.4	110382	187052	48933.7	235986	17560.3	16940.7	34501	NA	NA	NA	1.36788e+06	64776.8	27002.7	0.640005	1.41837	0.118955	0.594076	0.247058	0.0456718	2.42826	2.45709	0.0288261	0.300448	25.3429	26.4523	25.49	19.8481	34.6376	FALSE	FALSE	FALSE	FALSE	FALSE	FALSE	FALSE
UU	1168	78X2W	45-47	734.11	32.8705	LC21030000061	1.1255e+06	306152	274638	181514	2.18258e+06	112696	35090.6	44905.7	79996.3	132224	40782.3	173006	11736.3	13228.2	24964.5	9574.6	4184.2	13758.8	964302	40629.5	15410	0.650112	1.51304	0.125831	0.515672	0.249316	0.0490991	2.5295	2.4926	0.0368993	0.358043	25.8084	27.0466	26.5016	20.375	35.5392	FALSE	FALSE	FALSE	FALSE	FALSE	FALSE	FALSE
UU	1168	78X2W	76-79	734.42	32.8943	LC2010000045	33000932	9271961	10651181	6.79685e+06	6068732	2943212	834508	570568	1.40508e+06	3.8889e+06	700610	4.58951e+06	284460	66637.8	351098	NA	NA	NA	26771420	1.02666e+06	448980	0.687426	1.56708	1.75509	5.43786	0.74779	0.32659	1.26595	2.62956	1.36361	0.843729	27.4662	29.2406	28.9707	22.5722	40.1214	TRUE	TRUE	FALSE	TRUE	TRUE	TRUE	TRUE
UU	1168	78X3W	12-14	735.28	32.9609	LC21030000062	968389	227578	200960	122222	1657475	77422.7	20088.9	25056.9	45145.8	68247.6	17195.6	85443.2	70626	5610.5	76236.5	NA	NA	NA	535964	31086.3	9707.2	0.63772	1.64422	0.121244	0.584256	0.240963	0.0446267	2.43873	2.44915	0.0104199	0.286809	25.2367	26.3179	25.4628	19.2899	34.1906	FALSE	FALSE	FALSE	FALSE	FALSE	FALSE	FALSE
UU	1168	78X3W	62-64	735.78	32.9999	LC19060050	5180000	1510000	1720000	1040000	9980000	583000	160000	142000	302000	585000	150000	735000	53700	43800	97500	17900	8479	26379	3560000	140000	67130	0.688852	1.65385	0.172345	0.519038	0.287872	0.0551927	2.51447	2.63498	0.120516	0.31536	27.5278	29.3245	29.0586	22.3053	37.9069	FALSE	FALSE	FALSE	FALSE	FALSE	FALSE	FALSE
UU	1168	78X4W	53-55	737.19	33.1107	LC21030000063	1.98906e+06	521126	457853	349341	3.24789e+06	181614	74633.7	90601.4	165235	284948	68792.6	353741	40633.7	23382.5	64016.2	8760.2	6500.4	15260.6	1.64095e+06	88100.9	28659.1	0.654869	1.31062	0.140969	0.612414	0.279186	0.0529564	2.40154	2.50954	0.108007	0.399408	26.0249	27.3263	26.8105	19.6082	36.4362	FALSE	FALSE	FALSE	FALSE	FALSE	FALSE	FALSE
UU	1168	78X5W	91-94	739.06	33.2581	LC2010000012	1754728	421221	404985	243952	2.87804e+06	145946	41202.9	47510.5	88713.4	157279	33303.8	190582	15109	16036.1	31145.1	11942.4	NA	11942.4	930480	47155.1	17489.7	0.653631	1.6601	0.140715	0.609695	0.261387	0.0482627	2.40371	2.50512	0.101408	0.295947	25.9687	27.2535	26.4945	19.6991	35.2201	FALSE	FALSE	FALSE	FALSE	FALSE	FALSE	FALSE
UU	1168	78X6W	12-14	739.78	33.3148	LC21030000064	2.61762e+06	640459	586724	390223	4.01372e+06	170622	68783.4	67238.3	136022	259673	50083.8	309757	20223.7	26128.5	46352.2	NA	NA	NA	1.47944e+06	77701.5	32645.9	0.641807	1.50356	0.14618	0.652167	0.278779	0.0407763	2.34245	2.46337	0.120921	0.324169	25.4265	26.5583	26.2489	19.2147	35.3294	FALSE	FALSE	FALSE	FALSE	FALSE	FALSE	FALSE
UU	1168	78X7W	46-49	741.62	33.4582	LC2010000047	77258952	20043654	16112168	13235685	128000032	6118609	1.91245e+06	1.19419e+06	3.10664e+06	7832087	1419607	9251694	709074	476407	1.18548e+06	210115	72723.9	282839	48955832	2111346	921575	0.638919	1.21733	0.125876	0.603585	0.269149	0.0456209	2.40998	2.45331	0.0433291	0.323875	25.2925	26.3884	25.8985	19.4456	35.2026	FALSE	FALSE	FALSE	FALSE	FALSE	FALSE	FALSE
UU	1168	78X8W	08-10	742.34	33.5136	LC21030000065	4.22426e+06	890402	749623	435800	6469977	243193	77346.9	72553.4	149900	257260	67201.4	324461	37593.3	34021.9	71615.2	9620.2	6207.9	15828.1	1.30647e+06	66346	29576.5	0.616043	1.72011	0.115862	0.652901	0.236184	0.0362262	2.34759	2.37562	0.0280321	0.215837	24.2094	25.0434	23.4915	17.3542	32.7746	FALSE	FALSE	FALSE	FALSE	FALSE	FALSE	FALSE
UU	1168	79X1W	83-85	743.635	33.6116	LC19060045	13900000	3530000	2510000	2190000	21500000	723000	319000	180000	499000	1310000	237000	1547000	108000	62200	170200	40000	11800	51800	6130000	310000	155000	0.605719	1.14612	0.116744	0.646512	0.270253	0.0325339	2.3451	2.34169	0.00340638	0.275509	23.7073	24.4363	23.1611	16.4163	31.8213	FALSE	FALSE	FALSE	FALSE	FALSE	FALSE	FALSE
UU	1168	79X3W	10-12	745.91	33.8069	LC21030000066	1.61518e+06	376022	250005	216969	2369455	113682	46173.4	44378.4	90551.8	157291	46394.3	203685	13490.3	12620.6	26110.9	6746.2	4546.9	11293.1	883180	61912.5	22877.4	0.606951	1.15226	0.105512	0.681667	0.253446	0.0457814	2.31912	2.3457	0.026582	0.331959	23.7677	24.5087	23.2335	17.5381	31.5745	FALSE	FALSE	FALSE	FALSE	FALSE	FALSE	FALSE
UU	1168	79X-4W	77-78	748.07	34.0981	LC19030000122	14904100	3436780	3221680	1729190	23068800	965438	243702	178176	421878	1053470	146941	1200411	66487	75263.2	141750	NA	NA	NA	4049820	194749	82729.5	0.632551	1.86312	0.139655	0.646072	0.258703	0.0401693	2.34976	2.43134	0.0815788	0.197353	24.9949	26.014	24.8669	18.8858	34.9016	FALSE	FALSE	FALSE	FALSE	FALSE	FALSE	FALSE
UU	1168	79X5W	121-123	750.02	34.3517	LC21030000067	4.08999e+06	968725	845570	442523	6419476	357440	106919	119793	226712	318816	107504	426320	36411.2	34533.8	70945	NA	NA	NA	2715743	121208	44289.6	0.629446	1.91079	0.131719	0.637122	0.249821	0.0527438	2.36938	2.42072	0.0513359	0.344165	24.8487	25.8314	24.9129	18.6618	33.5236	FALSE	FALSE	FALSE	FALSE	FALSE	FALSE	FALSE
UU	1168	79X6W	80-83	751.115	34.4502	LC19060043	4680000	1260000	1230000	718000	8200000	515000	123000	121000	244000	461000	154000	615000	48000	42100	90100	14500	9720	24220	4000000	139000	60000	0.661563	1.71309	0.15	0.570732	0.26906	0.0590935	2.45341	2.53365	0.0802352	0.372081	26.3271	27.7199	27.2976	20.3621	36.8644	FALSE	FALSE	FALSE	FALSE	FALSE	FALSE	FALSE
UU	1168	80X1W	70-73	753.115	34.5891	LC19060048	7810000	2240000	1990000	1420000	13700000	827000	215000	204000	419000	806000	258000	1064000	86600	59500	146100	26400	14200	40600	5900000	242000	113000	0.654161	1.40141	0.145255	0.570073	0.280022	0.0569285	2.45071	2.50701	0.0563027	0.350187	25.9928	27.2847	26.5922	20.3029	37.3268	FALSE	FALSE	FALSE	FALSE	FALSE	FALSE	FALSE
UU	1168	80X2W	81-84	754.71	34.6848	LC20090048	21449588	5893851	5134870	3.4101e+06	40465956	2.52408e+06	499306	447374	946680	2.03242e+06	613029	2.64545e+06	183157	197264	380421	66199.8	NA	66199.8	15159270	621651	302189	0.652545	1.50578	0.126894	0.530065	0.251421	0.0587132	2.51468	2.50125	0.0134348	0.316654	25.9193	27.1896	26.1317	20.0392	35.9347	FALSE	FALSE	FALSE	FALSE	FALSE	FALSE	FALSE
UU	1168	80X3W	62-64	756.03	34.7546	LC21030000068	1.35306e+06	347179	294275	200437	2.21856e+06	125649	41685.7	44655.8	86341.5	124816	41473.8	166290	13214.8	8598.9	21813.7	NA	NA	NA	1.06587e+06	64879.1	21286.6	0.641173	1.46816	0.132642	0.609882	0.264239	0.0535997	2.40438	2.46116	0.0567774	0.372769	25.3971	26.521	25.9962	19.1774	35.7134	FALSE	FALSE	FALSE	FALSE	FALSE	FALSE	FALSE
UU	1168	80X3W	85-88	756.215	34.7637	LC19060051	4930000	1380000	1210000	878000	7610000	445000	147000	112000	259000	505000	135000	640000	50700	28200	78900	18300	5160	23460	3260000	147000	68400	0.647329	1.37813	0.159001	0.647832	0.300963	0.0552452	2.34936	2.48275	0.133395	0.353386	25.681	26.883	26.0598	19.6405	35.5069	FALSE	FALSE	FALSE	FALSE	FALSE	TRUE	FALSE
UU	1168	80X-04W	83-86	757.725	34.8329	LC19030000123	3123970	865750	904526	514391	5083250	288760	80345.4	72924.3	153270	273069	88956.2	362025	31230.7	22375.2	53605.9	NA	NA	NA	2164920	93012.7	41859.5	0.663581	1.75844	0.177942	0.614562	0.298389	0.0537527	2.38446	2.54097	0.156511	0.345234	26.4175	27.8386	27.0723	20.6579	36.4554	FALSE	FALSE	FALSE	FALSE	FALSE	FALSE	FALSE
UU	1168	80X-6W	78-81	760.695	34.9427	LC19060047	7890000	2280000	2070000	1530000	13300000	876000	186000	169000	355000	773000	212000	985000	79900	53200	133100	24100	9721	33821	5230000	261000	124061	0.662522	1.35294	0.155639	0.593233	0.293179	0.0617946	2.42303	2.53712	0.114094	0.330649	26.3701	27.7763	27.1363	21.2363	35.6907	FALSE	FALSE	FALSE	FALSE	FALSE	FALSE	FALSE
UU	1168	81x-03w	86-89	765.465	35.0617	LC19030000124	6718010	2178420	2563730	1700800	11374800	607835	164127	129517	293644	675371	149396	824767	61148	44004.7	105153	NA	NA	NA	4391710	190798	85253.3	0.691039	1.50737	0.225387	0.590605	0.349674	0.0507263	2.39977	2.64331	0.243546	0.326334	27.622	29.4531	28.7423	22.4456	39.779	FALSE	FALSE	FALSE	TRUE	FALSE	TRUE	FALSE
[truncated: 1 more columns]
